# Supplementary material
Source: PubMed Central journal article supplement (PMC8315937)

1 **Supplemental Information**

2

3 **Figure S1: Growth of *C. difficile* strains in TY medium supplemented with**  
4 **glucose.**

5 *C. difficile* R20291 (wild-type) (●), *C. difficile* KNM6 ( $\Delta selD$ ) (■), and *C. difficile* KNM9  
6 ( $\Delta selD::selD^+$ ) (▲) were grown in TY medium supplemented with glucose and growth  
7 was monitored over a 24 hour period. Data points represent the average from three  
8 independent experiments and error bars represent the standard deviation from the  
9 mean.

10 **Figure S2: Deletion of *spo0A* in *C. difficile* R20291.**

11 DNA was isolated from *C. difficile* R20291 (wild-type) and *C. difficile* KNM10 ( $\Delta spo0A$ ).  
12 The region surrounding the *spo0A* gene was amplified from the chromosome, and the  
13 resulting DNA was separated on an agarose gel. A clean deletion of *spo0A* is indicated  
14 by a faster-migrating DNA band while wild-type is indicated by a slower-migrating DNA  
15 band.

16 **Table S1: Complete list of gene expression fold-change from RNA-seq of wild-**  
17 **type and *selD* mutant strains.**

18 Shown in additional Microsoft Excel file.

19 **Table S2: Strains and plasmids used in this study.**

| Strain | Description/Phenotype | Source or Reference |
|--------|-----------------------|---------------------|
|--------|-----------------------|---------------------|

|                             |                                                                                                                                                                                                       |                 |
|-----------------------------|-------------------------------------------------------------------------------------------------------------------------------------------------------------------------------------------------------|-----------------|
| <i>E. coli</i> DH5 $\alpha$ | F <sup>-</sup> endA1 glnV44 thi-1 recA1 relA1 gyrA96 deoR nupG $\Phi$ 80d/lacZ $\Delta$ M15 $\Delta$ (lacZYA-argF)U169, hsdR17(r <sub>K</sub> <sup>-</sup> m <sub>K</sub> <sup>+</sup> ), $\lambda$ - | (1)             |
| <i>E. coli</i> HB101 pRK24  | <i>lavYI galK2 xyl-6 mtl-I repsL20</i> carrying pRK24                                                                                                                                                 | (2)             |
| <i>B. subtilis</i> BS49     | Tn916 donor strain, Tet <sup>R</sup>                                                                                                                                                                  | (3)             |
| <i>C. difficile</i> R20291  | Wild type, ribotype 027                                                                                                                                                                               | (4)             |
| <i>C. difficile</i> KNM6    | <i>selD</i> targeted CRISPR-cas9 mutant                                                                                                                                                               | (5)             |
| <i>C. difficile</i> KNM9    | KNM6 strain CRISPR-cas9 restoration of <i>selD</i> at its native locus, $\Delta$ <i>selD</i> :: <i>selD</i> <sup>+</sup>                                                                              | This study      |
| <i>C. difficile</i> KNM10   | <i>spo0A</i> targeted CRISPR-cas9 mutant                                                                                                                                                              | This study      |
| Plasmids                    |                                                                                                                                                                                                       |                 |
| pIA33                       | <i>P<sub>xyl</sub>::dCas9-opt P<sub>gdh</sub>::sgRNA-rfp catP</i>                                                                                                                                     | (6)             |
| pJK02                       | <i>P<sub>ter</sub>-Cas9-opt P<sub>gdh</sub>-sgRNA colE1 pCD6 traJ catP</i>                                                                                                                            | (5)             |
| pJS116                      | <i>B. subtilis-C. difficile</i> shuttle vector (pCD6 ColE1 <i>Tn916 oriT</i> Cm <sup>R</sup> )                                                                                                        | (7)             |
| pKM126                      | <i>tn916 oriT</i> in pJK02                                                                                                                                                                            | (5), This study |
| pKM142                      | <i>selD</i> with 500 bp upstream in pJS116                                                                                                                                                            | (5)             |
| pKM181                      | <i>selD</i> complementing homology region in pKM126                                                                                                                                                   | This study      |
| pKM183                      | sgRNA for targeting region surrounding <i>selD</i> deletion in pKM181                                                                                                                                 | This study      |
| pKM194                      | xylose-inducible <i>P<sub>xyl</sub></i> promoter in pKM183                                                                                                                                            | This study      |
| pKM197                      | xylose-inducible <i>P<sub>xyl</sub></i> promoter in pKM126                                                                                                                                            | (8), This study |
| pKM213                      | <i>spo0A</i> -targeting sgRNA in pKM197                                                                                                                                                               | This study      |
| pKM215                      | <i>spo0A</i> deletion homology region in pKM213                                                                                                                                                       | This study      |

20

21 **Table S3: Oligonucleotides used in this study.**

| Oligonucleotide        | Sequence                                                       | Reference  |
|------------------------|----------------------------------------------------------------|------------|
| 5'Tn916ori             | AAGCGGAAGAGCGCCCAATACGCAGGGGCCCTA<br>ACATCTTCTATTTTTCCCA       | (5)        |
| 3'Tn916ori             | TATCTACAATTTTTTATCCTGCAGGGGGCCCCT<br>AAAGGGAATGTAGATAAATTATTAG | (5)        |
| 5' <i>selD</i> _comp   | CAATTTTTTATCAGGAAACAGCTATGACCGCG<br>GCCGCACCTAAAATAGGTGAAGCAAC | This study |
| 3' <i>selD</i> _comp 2 | GGTCTTAAGCGATCGCGCATGTCTGCAGGCCT<br>CGAGCGCTGCATTATTATTACAA    | This study |

|                          |                                                                                                                                                                                                                            |            |
|--------------------------|----------------------------------------------------------------------------------------------------------------------------------------------------------------------------------------------------------------------------|------------|
| CRISPR_selD_c<br>omp2    | GTGTGCTATAATTTAACTGTAAAACGCGTAGCC<br>GCTAAAATAGGGCCAGGTTTTAGAGCTAGAAAT<br>AGCAAGTTAAAATAAGGCTAGTCCGTTATCAACT<br>TGAAAAAGTGGCACCGAGTCGGTGCTTTTTTTC<br>TATGGAGAAATCTAGATCAGCATGATGTCTGAC<br>TAGACGCGTAAGCTCTGCAACTATTTTTAGAT | This study |
| 5'selDcomp_HR_<br>xylR 2 | GTAAGTGTGTAATAATAATGCAGCGCTCGAG<br>CTAGCATAAAAATAAGAAGCCT                                                                                                                                                                  | This study |
| 3'cas9_Pxyl 2            | TAATCCTATACTATATTTTTTATCCATTTAATTAA<br>CTCTCCTCTTTACCCTCCTT                                                                                                                                                                | This study |
| 5'pyrE_HR_xylR<br>2      | CATTCAAAAGAAGGAAGAACATCAATGCTTCTC<br>GAGCTAGCATAAAAATAAGAAGCCT                                                                                                                                                             | This study |
| CRISPR_spo0A_<br>2       | GTGTGCTATAATTTAACTGTAAAACGCGTGACAT<br>GCAATAGAGGTTGCAGTTTTAGAGCTAGAAATA<br>GCAAGTTAAAATAAGGCTAGTCCGTTATCAACTT<br>GAAAAAGTGGCACCGAGTCGGTGCTTTTTTCT<br>ATGGAGAAATCTAGATCAGCATGATGTCTGACT<br>AGACGCGTAAGCTCTGCAACTATTTTTAGAT  | This study |
| 5' spo0A_UP              | TTTTTTTATCAGGAAACAGCTATGACCGCGGCC<br>GCCAGAAAACCATAATAAAGAGTTTAA                                                                                                                                                           | This study |
| 3' spo0A_UP              | TGTCTTGTCTGTTGAATGTCTTCTTCTGCTAA<br>AAAACATCTTCTTATTACAGAAAAC                                                                                                                                                              | This study |
| 5' spo0A_DN              | GATGTTTTTAGCAGAAGGAAGACATTCAACAG<br>GACAAGACATAAAAAGTAAGGC                                                                                                                                                                 | This study |
| 3' spo0A_DN              | AATGCAGGCTTCTTATTTTTATGCTAGCTCGAGG<br>ATTTATAACTGCTATTTCCCC                                                                                                                                                                | This study |
| 5'selD                   | GAGCTTCCTAAAATGAAGTAAATATCAATAAAC<br>AG                                                                                                                                                                                    | (5)        |
| 3'selD                   | TTTTGCTCAAACAATCACTCTTTCTCTATAATAT<br>T                                                                                                                                                                                    | (5)        |
| 5'spo0A_del              | CAAATAATTCAGAGCTAGGTATAAGTGGTAATAT                                                                                                                                                                                         | This study |
| 3'spo0A_del              | CAATGCCTTAATTTAAAAGCCTTACTTTTTATGT<br>CTTG                                                                                                                                                                                 | This study |
| 5' tcdB                  | TTACATTTTGTTGGATTGGAGGTC                                                                                                                                                                                                   | (5)        |
| 3' tcdB                  | AGCAGCTAAATTCACCTTTCTACC                                                                                                                                                                                                   | (5)        |
| 5' catP 3                | ATGGTATTTGAAAAAATTGATAAAAATAG                                                                                                                                                                                              | (5)        |
| 3' catP 2                | TTAACTATTTATCAATTCCTGCAATTCG                                                                                                                                                                                               | (5)        |
| 5'tetR_CO_cas9           | CTGAGCTCAATAACTAGGAGGTTTTTTAATT<br>AAATGGATAAAAATATAGTATAGGATTAGATAT<br>AGGAAC                                                                                                                                             | (5)        |
| 3'COcas9 (975)           | GTAATGTAAATCTTGATGATGTTTCATC                                                                                                                                                                                               | This study |
| 5'gdh                    | TGCAGGCTTCTTATTTTTATGGTTTAAACGGTTT<br>TAGCTGGGATATCG                                                                                                                                                                       | (5)        |
| 3'gRNA 2                 | CATCTAAAATAGTTGCAGAGCTTACGCGTCTA<br>GTCAGACATCATGCTGA                                                                                                                                                                      | (5)        |

|              |                                 |            |
|--------------|---------------------------------|------------|
| 5'rpoB_qPCR  | GAGTGTAAGAGAGAGATGC             | (9)        |
| 3'rpoB_qPCR  | CTTCCGCATAGTAAACACC             | (9)        |
| 5' tcdB_qPCR | GGCAAATGTAAGATTTCTGTTC          | (10)       |
| 3' tcdB_qPCR | TCGACTACAGTATTCTCTGAC           | (10)       |
| 5'0963_qPCR  | CAGACTGTTGCAGATAGCATTGAGTA      | This study |
| 3'0963_qPCR  | CAACAACAAATCTGTTTACACCTTGA      | This study |
| 5'0962_qPCR  | TCAGGCTCCTACAACACTTTTATTTG      | This study |
| 3'0962_qPCR  | TCTGCATTACTTTCCTCGATTATCTC      | This study |
| 5'prdB_qPCR  | GGAAGAGGGAGTAGACGGTGTAGTT       | This study |
| 3'prdB_qPCR  | ACGATCACGGCAGTTCTATGG           | This study |
| 5'grdB_qPCR  | TATAGCAGGAGTTATGGATTTAACAGAAGAG | This study |
| 3'grdB_qPCR  | CTAAATTTGCATACACTGGGTCATATC     | This study |
| 5'grdA_qPCR  | TTTCGCTGGACCACTTGCT             | This study |
| 3'grdA_qPCR  | TGGTTCCTCAACAACGTGGTAA          | This study |
| 5'mtlF_qPCR  | CATATATGGGAATGGGAGTTGCTAT       | This study |
| 3'mtlF_qPCR  | TTTCTCCATCAAATCTATACCATTAGG     | This study |

22

23

- 24 1. **Hanahan D.** 1983. Studies on transformation of *Escherichia coli* with plasmids. *J Mol Biol* **166**:557-580.
- 25 2. **Bouillaut L, McBride SM, Sorg JA.** 2011. Genetic manipulation of *Clostridium difficile*. *Curr Protoc Microbiol* **Chapter 9**:Unit 9A 2.
- 26 3. **Haraldsen JD, Sonenshein AL.** 2003. Efficient sporulation in *Clostridium difficile* requires disruption of the *sigmaK* gene. *Molecular Microbiology* **48**:811-821.
- 27 4. **Stabler RA, He M, Dawson L, Martin M, Valiente E, Corton C, Lawley TD, Sebahia M, Quail MA, Rose G, Gerding DN, Gibert M, Popoff MR, Parkhill J, Dougan G, Wren BW.** 2009. Comparative genome and phenotypic analysis of *Clostridium difficile* 027 strains provides insight into the evolution of a hypervirulent bacterium. *Genome Biol* **10**:R102.
- 28 5. **McAllister KN, Bouillaut L, Kahn JN, Self WT, Sorg JA.** 2017. Using CRISPR-Cas9-mediated genome editing to generate *C. difficile* mutants defective in selenoproteins synthesis. *Scientific Reports* **7**:14672.
- 29 6. **Muh U, Pannullo AG, Weiss DS, Ellermeier CD.** 2019. A xylose-inducible expression system and a CRISPRi-plasmid for targeted knock-down of gene expression in *Clostridioides difficile*. *J Bacteriol.*
- 30 7. **Francis MB, Allen CA, Shrestha R, Sorg JA.** 2013. Bile acid recognition by the *Clostridium difficile* germinant receptor, CspC, is important for establishing infection. *PLoS Pathog* **9**:e1003356.
- 31 8. **Bhattacharjee D, Sorg JA.** 2020. Factors and conditions that impact electroporation of *Clostridioides difficile* strains. *mSphere* **5**.
- 32 9. **Fimlaid KA, Bond JP, Schutz KC, Putnam EE, Leung JM, Lawley TD, Shen A.** 2013. Global analysis of the sporulation pathway of *Clostridium difficile*. *PLoS Genet* **9**:e1003660.
- 33 10. **Edwards AN, Tamayo R, McBride SM.** 2016. A novel regulator controls *Clostridium difficile* sporulation, motility and toxin production. *Mol Microbiol* **100**:954-971.

50



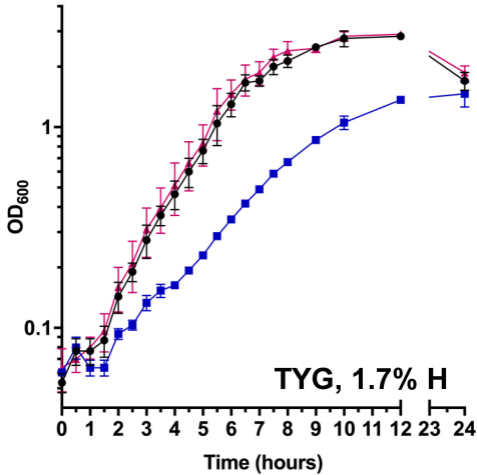

7 KB ladder

No DNA control

wild-type

$\Delta$ spo0A

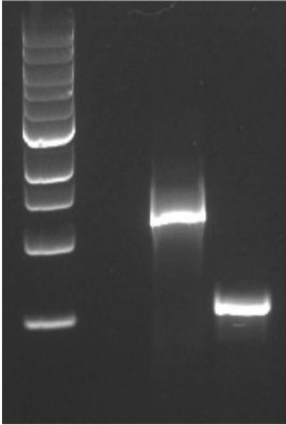

Supplement: jb.00008-21-s0001.pdf [file jb.00008-21-s0001.pdf]
